# Supplementary material for: Distribution profiles of selected organic pollutants in soils and sediments of industrial, residential and agricultural areas of South Africa
Source: Royal Society of Chemistry journal article supplement (doi:10.1039/b905585a), 2009-01-01
Supplement: b905585a.pdf [file b905585a.pdf]

Table 1: Abbreviations of chemicals used in text and figures

| Abbreviation                     | Name                                                   | Abbreviation                                    | Name                                 |
|----------------------------------|--------------------------------------------------------|-------------------------------------------------|--------------------------------------|
| DDT                              | 1,1,1-trichloro-2,2-bis( <i>p</i> -chlorophenyl)ethane | <b>Organochlorine pesticides</b>                |                                      |
| DDD                              | 1,1-dichloro-2,2-bis( <i>p</i> -chlorophenyl)ethane    | Endos-I                                         | Endosulfan-I                         |
| DDE                              | 1,1-dichloro-2,2-bis( <i>p</i> -chlorophenyl)ethylene  | Endos-II                                        | Endosulfan-II                        |
| HCH                              | Hexachlorocyclohexane                                  | Endos-S                                         | Endosulfan-sulfate                   |
| OCPs                             | Organochlorine pesticides                              | <b>Polyaromatic hydrocarbons</b>                |                                      |
| OCS                              | Octachlorostyrene                                      | Nap                                             | Naphthalene                          |
| PAHs                             | Polycyclic aromatic hydrocarbons                       | Acy                                             | Acenaphthylene                       |
| PCBs                             | Polychlorinated biphenyls                              | Ace                                             | Acenaphthene                         |
| PCBz                             | Polychlorinated benzenes                               | Fl                                              | Fluorene                             |
| PCDDs                            | Polychlorinated dibenzo- <i>p</i> -dioxin              | Phe                                             | Phenanthrene                         |
| PCDFs                            | Polychlorinated dibenzofurans                          | Ant                                             | Antracene                            |
| PCNs                             | Polychlorinated naphthalenes                           | Flu                                             | Fluoranthene                         |
| <b>Polychlorinated biphenyls</b> |                                                        | Pyr                                             | Pyrene                               |
| CB18                             | 2,2',5'-TriCB                                          | B(a)A                                           | Benz(a)anthracene                    |
| CB28                             | 2,4,4'-TriCB                                           | Chy/ Triphenylene                               | Chrysene/Triphenylene                |
| CB31                             | 2,4',5'-TriCB                                          | B(bjk)f                                         | Benzo(b/j/k)fluoranthenes            |
| CB33                             | 2',3,4'-TriCB                                          | B(a)P                                           | Benzo(a)pyrene                       |
| CB37                             | 3,4,4'-TriCB                                           | InP                                             | Indeno(1,2,3-cd)pyrene               |
| CB47                             | 2,2',4,4'-TetCB                                        | DbA                                             | Diben(ac/ah)anthracene               |
| CB52                             | 2,2',5,5'-TetCB                                        | B(ghi)P                                         | Benzo(ghi)perylene                   |
| CB66                             | 2,3',4,4'-TetCB                                        | <b>Polychlorinated naphthalenes</b>             |                                      |
| CB74                             | 2,4,4',5'-TetCB                                        | TeCN1                                           | 1,3,5,7-TeCN                         |
| CB77*                            | 3,3',4,4'-TetCB                                        | TeCN2                                           | 1,2,5,6-TeCN                         |
| CB81*                            | 3,4,4',5'-TetCB                                        | TeCN3                                           | 2,3,6,7-TeCN                         |
| CB99                             | 2,2',4,4',5'-PenCB                                     | PeCN1                                           | 1,2,3,5,7-PeCN                       |
| CB101                            | 2,2',4,5,5'-PenCB                                      | PeCN2                                           | 1,2,3,6,7-PeCN                       |
| CB105                            | 2,3,3',4,4'-PenCB                                      | PeCN3                                           | 1,2,3,5,8-PeCN                       |
| CB114                            | 2,3,4,4',5'-PenCB                                      | HxCN1/HxCN2                                     | 1,2,3,4,6,7-HxCN<br>1,2,3,5,6,7-HxCN |
| CB118                            | 2,3',4,4',5'-PenCB                                     | HxCN3                                           | 1,2,3,5,6,8-HxCN                     |
| CB122                            | 2',3,3',4,5'-PenCB                                     | HxCN4/HxCN5                                     | 1,2,4,5,6,8-HxCN<br>1,2,4,5,7,9-HxCN |
| CB123                            | 2',3,4,4',5'-PenCB                                     | HxCN6                                           | 1,2,3,6,7,8-HxCN                     |
| CB126*                           | 3,3',4,4',5'-PenCB                                     | HpCN7                                           | 1,2,3,4,5,6,7-HpCN                   |
| CB128                            | 2,2',3,3',4,4'-HexCB                                   | HpCN8                                           | 1,2,3,4,5,6,8-HpCN                   |
| CB138                            | 2,2',3,4,4',5'-HexCB                                   | <b>Polychlorinated dibenzo-<i>p</i>-dioxins</b> |                                      |
| CB141                            | 2,2',3,4,5,5'-HexCB                                    | TCDD                                            | 2,3,7,8-TCDD                         |
| CB149                            | 2,2',3,4',5',6'-HexCB                                  | PCDD                                            | 1,2,3,7,8-PeCDD                      |
| CB153                            | 2,2',4,4',5,5'-HexCB                                   | HxCDD1                                          | 1,2,3,4,7,8-HxCDD                    |
| CB156                            | 2,3,3',4,4',5'-HexCB                                   | HxCDD2                                          | 1,2,3,6,7,8-HxCDD                    |
| CB157                            | 2,3,3',4,4',5'-HexCB                                   | HxCDD3                                          | 1,2,3,7,8,9-HxCDD                    |
| CB167                            | 2,3',4,4',5,5'-HexCB                                   | HpCD                                            | 1,2,3,4,6,7,8-HpCDD                  |
| CB169*                           | 3,3',4,4',5,5'-HexCB                                   | OCDD                                            | OCDD                                 |
| CB170                            | 2,2',3,3',4,4',5'-HepCB                                | <b>Polychlorinated dibenzofurans</b>            |                                      |
| CB180                            | 2,2',3,4,4',5,5'-HepCB                                 | TCDF                                            | 2,3,7,8-TCDF                         |
| CB183                            | 2,2',3,4,4',5',6'-HepCB                                | PCDF1                                           | 1,2,3,7,8/1,2,3,4,8-PeCDF            |
| CB187                            | 2,2',3,4',5,5',6'-HepCB                                | PCDF2                                           | 2,3,4,7,8-PeCDF                      |
| CB189                            | 2,3,3',4,4',5,5'-HepCB                                 | HxCDF1/HxCDF2                                   | 1,2,3,4,7,8/1,2,3,4,7,9-HxCDF        |
| CB194                            | 2,2',3,3',4,4',5,5'-OctCB                              | HxCDF3                                          | 1,2,3,6,7,8-HxCDF                    |

Supplementary Material (ESI) for Journal of Environmental Monitoring  
 This journal is © The Royal Society of Chemistry 2009

|                                 |                             |                             |                                      |
|---------------------------------|-----------------------------|-----------------------------|--------------------------------------|
| CB206                           | 2,2',3,3',4,4',5,5',6-NonCB | HxCF4                       | 1,2,3,7,8,9-HxCDF                    |
| CB209                           | DecaCB                      | HxCF5                       | 2,3,4,6,7,8-HxCDF                    |
| <b>Polychlorinated benzenes</b> |                             | HpCF1                       | 1,2,3,4,6,7,8-HpCDF                  |
| PeCBz                           | Pentachlorinated benzenes   | HpCF2                       | 1,2,3,4,7,8,9-HpCDF                  |
| HCB                             | Hexachlorobenzene           | OCDF                        | OCDF                                 |
| TeCBz                           | Tetrachlorinated benzenes   | <b>Industrial chemicals</b> |                                      |
|                                 |                             | SCCP                        | Short chained chlorinated paraffins  |
|                                 |                             | MCCP                        | Medium chained chlorinated paraffins |

\* Dioxin-like PCBs

Table 2: Concentration of the individual compounds and their isomers as used in the PCA.

| Compound (ng/g)                   | Compound abbreviation | Site       |                   |                   |                   |                   |                   |                   |                   |                   |                   |                   |                     |                   |
|-----------------------------------|-----------------------|------------|-------------------|-------------------|-------------------|-------------------|-------------------|-------------------|-------------------|-------------------|-------------------|-------------------|---------------------|-------------------|
|                                   |                       | S-Inf-Soil | Vdb-Inf-Soil      | SkbrRiv1          | VaalRiv           | VaalRivK          | KlipRiv           | TbosSpr           | RietSpr           | SkbrRiv2          | SkbrRiv3          | OrangeRiv         | S-Ind-Soil          | Vdp-Ind-Soil      |
| <b>Polychlorinated biphenyl's</b> |                       |            |                   |                   |                   |                   |                   |                   |                   |                   |                   |                   |                     |                   |
| 2,2'5'-TriCB                      | CB18                  | 0.03       | 0.02              | 0.02              | 0.03              | 0.03              | 0.1               | 0.02              | 0.12              | 0.03              | 0.03              | 0.18              | 0.19                | 0.39              |
| 2,4,4'-TriCB                      | CB28                  | 0.04       | 0.07              | 0.03              | 0.06              | 0.05              | 0.24              | 0.03              | 0.23              | 0.04              | 0.04              | 0.18              | 0.18                | 0.71              |
| 2,4',5'-TriCB                     | CB31                  | 0.04       | 0.03              | 0.03              | 0.04              | 0.04              | 0.16              | 0.03              | 0.18              | 0.03              | 0.03              | 0.18              | 0.18                | 0.58              |
| 2',3,4'-TriCB                     | CB33                  | 0.02       | 0.02              | 0.02              | 0.03              | 0.03              | 0.1               | 0.02              | 0.11              | 0.02              | 0.02              | 0.13              | 0.12                | 0.43              |
| 3,4,4'-TriCB                      | CB37                  | 0.02       | 0.01              | 0.01 <sup>a</sup> | 0.02              | 0.02              | 0.08              | 0.01              | 0.11              | 0.01 <sup>a</sup> | 0.01 <sup>a</sup> | 0.04              | 0.04                | 0.46              |
| 2,2',4,4'-TetCB                   | CB47                  | 0.02       | 0.06              | 0.01 <sup>a</sup> | 0.03              | 0.02              | 0.09              | 0.01 <sup>c</sup> | 0.1               | 0.01 <sup>c</sup> | 0.02              | 0.06              | 0.07                | 0.37              |
| 2,2',5,5'-TetCB                   | CB52                  | 0.03       | 0.02              | 0.02              | 0.03              | 0.04              | 0.18              | 0.02              | 0.25              | 0.02              | 0.04              | 0.16              | 0.19                | 0.52              |
| 2,3',4,4'-TetCB                   | CB66                  | 0.06       | 0.18              | 0.02 <sup>c</sup> | 0.09              | 0.03 <sup>c</sup> | 0.3               | 0.02 <sup>c</sup> | 0.22              | 0.02 <sup>c</sup> | 0.04              | 0.07              | 0.09 <sup>b</sup>   | 0.99              |
| 2,4,4',5'-TetCB                   | CB74                  | 0.03       | 0.15              | 0.01 <sup>c</sup> | 0.08              | 0.02 <sup>c</sup> | 0.16              | 0.02              | 0.11              | 0.01 <sup>a</sup> | 0.03              | 0.05              | 0.06                | 0.5               |
| 3,3',4,4'-TetCB                   | CB77*                 | 0.007      | 0.0059            | 0.00077           | 0.0021            | 0.0055            | 0.076             | 0.0051            | 0.05              | 0.00077           | 0.0022            | 0.0029            | 0.078               | 0.35              |
| 3,4,4',5'-TetCB                   | CB81*                 | 0.00048    | 0.00039           | 0.00004           | 0.00011           | 0.00022           | 0.0030            | 0.00021           | 0.0015            | 0.00006           | 0.00011           | 0.00016           | 0.0011 <sup>b</sup> | 0.013             |
| 2,2',4,4',5'-PenCB                | CB99                  | 0.2        | 0.78              | 0.04 <sup>c</sup> | 0.38              | 0.04 <sup>c</sup> | 0.47              | 0.03 <sup>c</sup> | 0.18              | 0.02 <sup>c</sup> | 0.15              | 0.04              | 0.05 <sup>c</sup>   | 1.4               |
| 2,2',4,5,5'-PenCB                 | CB101                 | 0.02       | 0.02              | 0.02              | 0.04              | 0.04              | 0.24              | 0.02              | 0.13              | 0.02              | 0.1               | 0.08              | 0.14                | 0.87              |
| 2,3,3',4,4'-PenCB                 | CB105                 | 0.08       | 0.36              | 0.03 <sup>c</sup> | 0.18              | 0.02 <sup>c</sup> | 0.28              | 0.01 <sup>c</sup> | 0.11              | 0.01 <sup>a</sup> | 0.15              | 0.02              | 0.03 <sup>c</sup>   | 0.67              |
| 2,3,4,4',5'-PenCB                 | CB114                 | 0.01       | 0.04              | 0.01 <sup>a</sup> | 0.02              | 0.01 <sup>a</sup> | 0.03              | 0.01 <sup>a</sup> | 0.01 <sup>a</sup> | 0.01 <sup>a</sup> | 0.02              | 0.01 <sup>a</sup> | 0.01 <sup>a</sup>   | 0.05              |
| 2,3',4,4',5'-PenCB                | CB118                 | 0.32       | 1.6               | 0.11 <sup>c</sup> | 0.77              | 0.1 <sup>c</sup>  | 1.0               | 0.06 <sup>c</sup> | 0.32              | 0.04 <sup>c</sup> | 0.56              | 0.06              | 0.1 <sup>c</sup>    | 2.2               |
| 2',3,3',4,5'-PenCB                | CB122                 | 0.01       | 0.13              | 0.01 <sup>a</sup> | 0.05              | 0.01 <sup>a</sup> | 0.04              | 0.01 <sup>a</sup> | 0.01 <sup>a</sup>   | 0.01 <sup>a</sup> |
| 2',3,4,4',5'-PenCB                | CB123                 | 0.01       | 0.02              | 0.01 <sup>a</sup> | 0.01 <sup>a</sup> | 0.01 <sup>a</sup> | 0.01 <sup>a</sup> | 0.01              | 0.01 <sup>a</sup>   | 0.04              |
| 3,3',4,4',5'-PenCB                | CB126*                | 0.00095    | 0.00063           | 0.00004           | 0.00013           | 0.00035           | 0.0031            | 0.00039           | 0.00129           | 0.00005           | 0.00044           | 0.00012           | 0.0061              | 0.035             |
| 2,2',3,3',4,4'-HexCB              | CB128                 | 0.07       | 0.3               | 0.03 <sup>c</sup> | 0.14              | 0.02 <sup>c</sup> | 0.23              | 0.01 <sup>c</sup> | 0.07              | 0.01 <sup>a</sup> | 0.15              | 0.01 <sup>a</sup> | 0.04                | 1.05              |
| 2,2',3,4,4',5'-HexCB              | CB138                 | 0.8        | 2.4               | 0.19 <sup>c</sup> | 1.14              | 0.16 <sup>c</sup> | 1.58              | 0.07 <sup>c</sup> | 0.5               | 0.09 <sup>c</sup> | 1.2               | 0.08              | 0.23 <sup>c</sup>   | 8.0               |
| 2,2',3,4,5,5'-HexCB               | CB141                 | 0.01       | 0.01 <sup>a</sup> | 0.01 <sup>a</sup> | 0.01              | 0.01              | 0.08              | 0.01 <sup>a</sup> | 0.03              | 0.01              | 0.05              | 0.01 <sup>a</sup> | 0.05                | 1.2               |
| 2,2',3,4',5',6'-HexCB             | CB149                 | 0.03       | 0.04              | 0.02              | 0.05              | 0.05              | 0.28              | 0.02              | 0.11              | 0.01              | 0.16              | 0.04              | 0.16                | 4.6               |
| 2,2',4,4',5,5'-HexCB              | CB153                 | 1.7        | 6.0               | 0.45 <sup>c</sup> | 2.9               | 0.37 <sup>c</sup> | 3.5               | 0.17 <sup>c</sup> | 1.04 <sup>c</sup> | 0.18 <sup>c</sup> | 2.2               | 0.17              | 0.34 <sup>c</sup>   | 14                |
| 2,3,3',4,4',5'-HexCB              | CB156                 | 0.09       | 0.34              | 0.03 <sup>c</sup> | 0.15              | 0.02 <sup>c</sup> | 0.21              | 0.01 <sup>a</sup> | 0.06              | 0.02 <sup>c</sup> | 0.17              | 0.01 <sup>a</sup> | 0.03 <sup>c</sup>   | 0.72              |
| 2,3,3',4,4',5'-HexCB              | CB157                 | 0.02       | 0.07              | 0.01 <sup>a</sup> | 0.03              | 0.01 <sup>a</sup> | 0.04              | 0.01 <sup>a</sup> | 0.01              | 0.01 <sup>a</sup> | 0.03              | 0.01 <sup>a</sup> | 0.01 <sup>a</sup>   | 0.12              |

|                                                                                         |                  |                   |                   |                   |                   |                     |                   |                   |                   |                   |                   |                   |                      |                   |
|-----------------------------------------------------------------------------------------|------------------|-------------------|-------------------|-------------------|-------------------|---------------------|-------------------|-------------------|-------------------|-------------------|-------------------|-------------------|----------------------|-------------------|
| 2,3',4,4',5,5'-HexCB                                                                    | CB167            | 0.05              | 0.2               | 0.01 <sup>c</sup> | 0.1               | 0.01 <sup>c</sup>   | 0.12              | 0.01 <sup>a</sup> | 0.03              | 0.01 <sup>a</sup> | 0.09              | 0.01 <sup>a</sup> | 0.01 <sup>c</sup>    | 0.39              |
| 3,3',4,4',5,5'-HexCB                                                                    | CB169*           | 0.00022           | 0.00013           | 0.00002           | 0.00005           | 0.0001 <sup>d</sup> | 0.00043           | 0.00003           | 0.00018           | 0.00001           | 0.0001            | 0.00005           | 0.00096 <sup>b</sup> | 0.0070            |
| 2,2',3,3',4,4',5-HepCB                                                                  | CB170            | 0.24              | 0.75              | 0.06 <sup>c</sup> | 0.39              | 0.05 <sup>c</sup>   | 0.5               | 0.03 <sup>c</sup> | 0.14              | 0.03 <sup>c</sup> | 0.41              | 0.02              | 0.1                  | 3.93              |
| 2,2',3,4,4',5,5'-HepCB                                                                  | CB180            | 0.83              | 2.9               | 0.27 <sup>c</sup> | 1.44              | 0.16 <sup>c</sup>   | 1.82              | 0.09 <sup>c</sup> | 0.55              | 0.11 <sup>c</sup> | 1.35              | 0.06              | 0.3                  | 12                |
| 2,2',3,4,4',5',6-HepCB                                                                  | CB183            | 0.12              | 0.34              | 0.03 <sup>c</sup> | 0.19              | 0.03 <sup>c</sup>   | 0.24              | 0.01 <sup>c</sup> | 0.07              | 0.02 <sup>c</sup> | 0.19              | 0.01              | 0.04 <sup>c</sup>    | 2.0               |
| 2,2',3,4',5,5',6-HepCB                                                                  | CB187            | 0.18              | 0.29              | 0.03 <sup>c</sup> | 0.14              | 0.03 <sup>c</sup>   | 0.31              | 0.01 <sup>c</sup> | 0.11              | 0.03 <sup>c</sup> | 0.21              | 0.02              | 0.1                  | 5.0               |
| 2,3,3',4,4',5,5'-HepCB                                                                  | CB189            | 0.01              | 0.05              | 0.01 <sup>a</sup> | 0.02              | 0.01 <sup>a</sup>   | 0.03              | 0.01 <sup>a</sup> | 0.01 <sup>a</sup> | 0.01 <sup>a</sup> | 0.02              | 0.01 <sup>a</sup> | 0.01 <sup>a</sup>    | 0.16              |
| 2,2',3,3',4,4',5,5'-OctCB                                                               | CB194            | 0.11              | 0.39              | 0.05              | 0.2               | 0.02 <sup>c</sup>   | 0.3               | 0.01              | 0.09              | 0.02 <sup>c</sup> | 0.2               | 0.01 <sup>q</sup> | 0.06                 | 2.7               |
| 2,2',3,3',4,4',5,5',6-NonCB                                                             | CB206            | 0.06              | 0.09              | 0.01              | 0.05              | 0.02                | 0.27              | 0.01 <sup>a</sup> | 0.09              | 0.01 <sup>a</sup> | 0.06              | 0.01 <sup>a</sup> | 0.07                 | 0.86              |
| DecaCB                                                                                  | CB209            | 0.09              | 0.05              | 0.01 <sup>a</sup> | 0.03              | 0.01 <sup>a</sup>   | 0.07              | 0.01 <sup>a</sup> | 0.03              | 0.01              | 0.02              | 0.01 <sup>a</sup> | 1.36                 | 0.16              |
| <b>Σ Mono-ortho PCBs</b>                                                                |                  | <b>5.3</b>        | <b>18</b>         | <b>1.6</b>        | <b>8.8</b>        | <b>1.5</b>          | <b>13</b>         | <b>0.82</b>       | <b>5.1</b>        | <b>0.89</b>       | <b>7.8</b>        | <b>1.8</b>        | <b>4.4</b>           | <b>67</b>         |
| <b>Σ Non-ortho PCBs</b>                                                                 |                  | <b>0.009</b>      | <b>0.007</b>      | <b>0.001</b>      | <b>0.002</b>      | <b>0.006</b>        | <b>0.083</b>      | <b>0.006</b>      | <b>0.053</b>      | <b>0.001</b>      | <b>0.003</b>      | <b>0.003</b>      | <b>0.086</b>         | <b>0.41</b>       |
| <b><u>Polychlorinated benzenes, octachlorostyrene and polychlorinated paraffins</u></b> |                  |                   |                   |                   |                   |                     |                   |                   |                   |                   |                   |                   |                      |                   |
| PeCBz                                                                                   | PeCBz            | 0.05              | 0.04              | 0.01 <sup>c</sup> | 0.01              | 0.02                | 0.03              | 0.03              | 0.02              | 0.01 <sup>a</sup> | 0.02              | 0.03              | 0.71                 | 0.46              |
| HCB                                                                                     | HCB              | 0.53              | 0.87              | 0.03 <sup>c</sup> | 0.08 <sup>c</sup> | 0.13                | 0.08 <sup>c</sup> | 0.32              | 0.08 <sup>c</sup> | 0.21              | 0.08              | 0.11              | 15                   | 2.9               |
| Σ TeCBz                                                                                 | Σ TeCBz          | 0.00007           | 0.00006           | 0.00002           | 0.00004           | 0.00003             | 0.00005           | 0.00002           | 0.00004           | 0.00001           | 0.00008           | 0.0001            | 0.00024              | 0.00012           |
| OCS                                                                                     | OCS              | 0.07              | 0.04 <sup>a</sup> | 0.04 <sup>a</sup> | 0.06 <sup>a</sup> | 0.09 <sup>a</sup>   | 0.11 <sup>a</sup> | 0.07 <sup>a</sup> | 0.07 <sup>a</sup> | 0.24 <sup>a</sup> | 0.04 <sup>a</sup> | 0.07 <sup>a</sup> | 2.24                 | 0.10 <sup>a</sup> |
| SCCP                                                                                    | SCCP             | 25                | 8.1               | 4.3               | 6.9               | 5.3                 | 47                | 29                | 30                | 3.9               | 4.1               | 4.4               | 16                   | 44                |
| MCCP                                                                                    | MCCP             | 130               | 3.9               | 1.8               | 15                | 8.5                 | 1200              | 14                | 62                | 2.4               | 4.4               | 15                | 25                   | 480               |
| <b><u>Organochlorine pesticides</u></b>                                                 |                  |                   |                   |                   |                   |                     |                   |                   |                   |                   |                   |                   |                      |                   |
| Endosulfan-I                                                                            | Endos-I          | 0.03              | 0.01              | 0.02              | 0.01              | 0.02                | 0.03              | 0.01              | 0.01              | 0.02              | 0.01              | 0.1               | 0.16                 | 0.05 <sup>a</sup> |
| Endosulfan-II                                                                           | Endos-II         | 0.01 <sup>a</sup>   | 0.01 <sup>a</sup> | 0.01 <sup>a</sup> | 0.01 <sup>a</sup> | 0.01 <sup>a</sup> | 0.01 <sup>a</sup> | 0.01 <sup>a</sup> | 0.01 <sup>a</sup>    | 0.02 <sup>a</sup> |
| Endosulfan-sulfate                                                                      | Endos-S          | 0.01 <sup>a</sup>   | 0.01 <sup>a</sup> | 0.01 <sup>a</sup> | 0.01 <sup>a</sup> | 0.01 <sup>a</sup> | 0.01 <sup>a</sup> | 0.01 <sup>a</sup> | 0.01 <sup>a</sup>    | 0.01 <sup>a</sup> |
| <b>Σ Endosulfan</b>                                                                     |                  | <b>0.05</b>       | <b>0.03</b>       | <b>0.04</b>       | <b>0.03</b>       | <b>0.04</b>         | <b>0.05</b>       | <b>0.03</b>       | <b>0.03</b>       | <b>0.04</b>       | <b>0.03</b>       | <b>0.12</b>       | <b>0.18</b>          | <b>0.08</b>       |
| Dicofol                                                                                 | Dicofol          | 0.03 <sup>b</sup> | 0.01 <sup>a</sup> | 0.01 <sup>a</sup> | 0.01 <sup>a</sup> | 0.03 <sup>b</sup>   | 0.01 <sup>a</sup> | 0.02 <sup>a</sup> | 0.02 <sup>a</sup>    | 0.06 <sup>a</sup> |
| α-HCH                                                                                   | α-HCH            | 0.01 <sup>c</sup> | 0.01 <sup>a</sup> | 0.01 <sup>a</sup> | 0.01 <sup>c</sup> | 0.03                | 0.03              | 0.01 <sup>a</sup> | 0.02 <sup>c</sup> | 0.02              | 0.02              | 0.05              | 0.07                 | 0.01              |
| β-HCH                                                                                   | β-HCH            | 0.02 <sup>c</sup> | 0.03 <sup>c</sup> | 0.01 <sup>a</sup> | 0.02 <sup>a</sup> | 0.01                | 0.1               | 0.01 <sup>a</sup> | 0.04              | 0.01 <sup>a</sup> | 0.02              | 0.03              | 0.05                 | 0.07              |
| γ-HCH                                                                                   | γ-HCH            | 0.41              | 0.13              | 0.24              | 0.34              | 0.3                 | 0.58              | 0.18              | 0.35              | 0.24              | 0.36              | 1.62              | 1.7                  | 0.24              |
| <b>Σ-HCH</b>                                                                            |                  | <b>0.44</b>       | <b>0.17</b>       | <b>0.26</b>       | <b>0.37</b>       | <b>0.34</b>         | <b>0.71</b>       | <b>0.20</b>       | <b>0.41</b>       | <b>0.27</b>       | <b>0.4</b>        | <b>1.70</b>       | <b>1.86</b>          | <b>0.32</b>       |
| <i>o,p'</i> -DDE                                                                        | <i>o,p'</i> -DDE | 0.01 <sup>c</sup> | 0.01 <sup>a</sup> | 0.01 <sup>a</sup> | 0.01 <sup>a</sup> | 0.01 <sup>a</sup>   | 0.02              | 0.01 <sup>a</sup>    | 0.02              |
| <i>p,p'</i> -DDE                                                                        | <i>p,p'</i> -DDE | 1.1 <sup>c</sup>  | 6.6               | 0.39 <sup>a</sup> | 2.8 <sup>c</sup>  | 0.45 <sup>c</sup>   | 3.7 <sup>c</sup>  | 0.25 <sup>c</sup> | 2.9               | 0.19 <sup>c</sup> | 1.8 <sup>c</sup>  | 0.32 <sup>c</sup> | 0.19 <sup>c</sup>    | 4.8 <sup>c</sup>  |
| <i>o,p'</i> -DDD                                                                        | <i>o,p'</i> -DDD | 0.01 <sup>a</sup> | 0.01 <sup>a</sup> | 0.01 <sup>a</sup> | 0.01 <sup>a</sup> | 0.02                | 0.15              | 0.01              | 0.04              | 0.01              | 0.02              | 0.01              | 0.01 <sup>a</sup>    | 0.02              |

|                                             |                   |                     |                   |                      |                      |                      |            |                      |                   |                      |            |                      |                   |                   |
|---------------------------------------------|-------------------|---------------------|-------------------|----------------------|----------------------|----------------------|------------|----------------------|-------------------|----------------------|------------|----------------------|-------------------|-------------------|
| <i>p,p'</i> -DDD                            | <i>p,p'</i> -DDD  | 0.03                | 0.01 <sup>a</sup> | 0.02 <sup>a</sup>    | 0.03                 | 0.11                 | 0.49       | 0.04                 | 0.13              | 0.04                 | 0.09       | 0.08                 | 0.02 <sup>c</sup> | 0.02 <sup>c</sup> |
| <i>o,p'</i> -DDT                            | <i>o,p'</i> -DDT  | 0.11                | 0.01 <sup>b</sup> | 0.01 <sup>a</sup>    | 0.01 <sup>a</sup>    | 0.01                 | 0.03       | 0.01 <sup>a</sup>    | 0.02 <sup>c</sup> | 0.01 <sup>a</sup>    | 0.02       | 0.03                 | 0.05              | 0.07              |
| <i>p,p'</i> -DDT                            | <i>p,p'</i> -DDT  | 0.47                | 0.05              | 0.02                 | 0.01                 | 0.03                 | 0.23       | 0.02                 | 0.05              | 0.01                 | 0.06       | 0.03                 | 0.2               | 0.27              |
| <b>ΣDDTs</b>                                |                   | <b>1.7</b>          | <b>6.7</b>        | <b>0.46</b>          | <b>2.9</b>           | <b>0.63</b>          | <b>4.6</b> | <b>0.34</b>          | <b>3.2</b>        | <b>0.3</b>           | <b>2.0</b> | <b>0.48</b>          | <b>0.48</b>       | <b>5.2</b>        |
| <b><u>Polyaromatic hydrocarbons</u></b>     |                   |                     |                   |                      |                      |                      |            |                      |                   |                      |            |                      |                   |                   |
| Naphthalene                                 | Nap               | 14                  | 18                | 2.5                  | 6.6                  | 6.6                  | 8.1        | 2.2                  | 22                | 4.2                  | 4.9        | 11                   | 59                | 60                |
| Acenaphthylene                              | Acy               | 3.4                 | 2.9               | 0.4                  | 0.16                 | 6.8                  | 4.5        | 5.7                  | 82                | 0.32                 | 0.24       | 0.31                 | 760               | 260               |
| Acenaphthene                                | Ace               | 0.72                | 1.1               | 0.1                  | 0.75                 | 8.0                  | 5.4        | 5.8                  | 26                | 1.6                  | 1.1        | 1.5                  | 130               | 80                |
| Fluorene                                    | Fl                | 2.8                 | 2.6               | 1.0 <sup>c</sup>     | 2.4                  | 16                   | 18         | 17                   | 50                | 5.8                  | 2.6        | 9.9                  | 240               | 100               |
| Phenanthrene                                | Phe               | 18                  | 21                | 5.9 <sup>c</sup>     | 10                   | 95                   | 65         | 44                   | 210               | 74                   | 17         | 26                   | 3700              | 1700              |
| Anthracene                                  | Ant               | 5.8                 | 3.2               | 0.77                 | 1.0                  | 20                   | 20         | 40                   | 110               | 13                   | 1.2        | 3.0                  | 1200              | 410               |
| Fluoranthene                                | Flu               | 35                  | 38                | 7.0                  | 15                   | 150                  | 97         | 110                  | 420               | 80                   | 27         | 29                   | 6700              | 3600              |
| Pyrene                                      | Pyr               | 29                  | 28                | 5.0                  | 12                   | 110                  | 78         | 87                   | 340               | 58                   | 23         | 20                   | 5500              | 2900              |
| Benz(a)anthracene                           | B(a)A             | 15                  | 11                | 2.0                  | 5.0                  | 63                   | 40         | 38                   | 210               | 16                   | 8.6        | 3.2                  | 3000              | 1700              |
| Chrysene/Triphenylene                       | Chy/ Triphenylene | 29                  | 21                | 3.3                  | 6.5                  | 73                   | 51         | 72                   | 220               | 18                   | 13         | 4.4                  | 3500              | 2100              |
| Benzo(b/j/k)fluoranthenes                   | B(bjk)f           | 55                  | 30                | 6.7                  | 9.2                  | 120                  | 87         | 160                  | 460               | 26                   | 26         | 5.5                  | 6100              | 3500              |
| Benzo(a)pyrene                              | B(a)P             | 19                  | 2.3               | 2.6                  | 3.4                  | 59                   | 38         | 62                   | 230               | 12                   | 13         | 2.4                  | 2900              | 1700              |
| Indeno(1,2,3-cd)pyrene                      | InP               | 26                  | 12                | 3.4                  | 4.4                  | 59                   | 39         | 93                   | 230               | 12                   | 14         | 2.5                  | 2900              | 1800              |
| Diben(ac)ah)anthracene                      | DbA               | 6.4                 | 3.3               | 0.82                 | 1.1                  | 14                   | 6.3        | 23                   | 58                | 2.7                  | 2.8        | 0.55                 | 610               | 420               |
| Benzo(ghi)perylene                          | B(ghi)P           | 19                  | 7.0               | 2.8                  | 3.0                  | 33                   | 23         | 63                   | 130               | 7.9                  | 8.6        | 1.9                  | 1500              | 1000              |
| <b>Σ PAHs</b>                               |                   | <b>280</b>          | <b>200</b>        | <b>44</b>            | <b>81</b>            | <b>830</b>           | <b>580</b> | <b>820</b>           | <b>2800</b>       | <b>330</b>           | <b>160</b> | <b>120</b>           | <b>38800</b>      | <b>21000</b>      |
| <b><u>Polychlorinated naphthalene's</u></b> |                   |                     |                   |                      |                      |                      |            |                      |                   |                      |            |                      |                   |                   |
| 1,3,5,7-TeCN                                | TeCN1             | 0.0001 <sup>b</sup> | 0.00023           | 0.00001 <sup>a</sup> | 0.00002 <sup>a</sup> | 0.00005              | 0.00031    | 0.00001 <sup>a</sup> | 0.00002           | 0.00004 <sup>a</sup> | 0.00015    | 0.00037              | 0.00034           | 0.0001            |
| 1,2,5,6-TeCN                                | TeCN2             | 0.013               | 0.00099           | 0.00017              | 0.0003               | 0.00032              | 0.0055     | 0.00012              | 0.00016           | 0.0014               | 0.0005     | 0.00002 <sup>a</sup> | 0.0006            | 0.0006            |
| 2,3,6,7-TeCN                                | TeCN3             | 0.0045              | 0.012             | 0.0015               | 0.0029               | 0.0011               | 0.046      | 0.00084              | 0.00065           | 0.0022               | 0.0027     | 0.0033               | 0.00097           | 0.0051            |
| 1,2,3,5,7-PeCN                              | PeCN1             | 0.0024              | 0.0023            | 0.00008              | 0.00011              | 0.00009 <sup>b</sup> | 0.0059     | 0.00015              | 0.00013           | 0.00004 <sup>a</sup> | 0.00043    | 0.0013               | 0.00073           | 0.00024           |
| 1,2,3,6,7-PeCN                              | PeCN2             | 0.0014              | 0.00035           | 0.00039              | 0.0003               | 0.00032              | 0.0040     | 0.00012              | 0.00033           | 0.00053              | 0.00041    | 0.00033              | 0.0028            | 0.00075           |
| 1,2,3,5,8-PeCN                              | PeCN3             | 0.0061              | 0.0034            | 0.00041              | 0.00082              | 0.0011               | 0.017      | 0.00052              | 0.0012            | 0.00063 <sup>b</sup> | 0.001      | 0.0014               | 0.00059           | 0.0043            |

Supplementary Material (ESI) for Journal of Environmental Monitoring  
This journal is © The Royal Society of Chemistry 2009

|                                          |                         |              |                      |                      |                      |                      |                      |                      |                      |                      |                      |                      |                      |                      |
|------------------------------------------|-------------------------|--------------|----------------------|----------------------|----------------------|----------------------|----------------------|----------------------|----------------------|----------------------|----------------------|----------------------|----------------------|----------------------|
| 1,2,3,4,6,7-HxCN                         | 1,2,3,5,6,7-HxCN2       | 0.01         | 0.0016               | 0.00015 <sup>b</sup> | 0.00024              | 0.00009              | 0.003                | 0.0012               | 0.00078              | 0.00063              | 0.00077              | 0.00038              | 0.0063               | 0.0023               |
| 1,2,3,5,6,8-HxCN                         | HxCN3                   | 0.0021       | 0.00065 <sup>b</sup> | 0.0001               | 0.00009              | 0.00006              | 0.002                | 0.00035              | 0.0006               | 0.00006 <sup>a</sup> | 0.00037              | 0.00024              | 0.00062              | 0.00097              |
| 1,2,4,5,6,8-HxCN                         | 1,2,4,5,7,9-HxCN4/HxCN5 | 0.0022       | 0.0010               | 0.00009              | 0.00014              | 0.00012              | 0.0032               | 0.00009 <sup>b</sup> | 0.00027              | 0.00022              | 0.00054              | 0.00043              | 0.00046              | 0.00036              |
| 1,2,3,6,7,8-HxCN                         | HxCN6                   | 0.00018      | 0.00014 <sup>d</sup> | 0.00008 <sup>a</sup> | 0.00006 <sup>a</sup> | 0.00005 <sup>a</sup> | 0.00006 <sup>a</sup> | 0.00003 <sup>a</sup> | 0.00005 <sup>a</sup> | 0.00016 <sup>a</sup> | 0.00017              | 0.00006 <sup>b</sup> | 0.00022 <sup>a</sup> | 0.00009 <sup>a</sup> |
| 1,2,3,4,5,6,7-HpCN                       | HpCN7                   | 0.024        | 0.0025               | 0.00011              | 0.00015              | 0.00047              | 0.0027               | 0.0029               | 0.00095              | 0.00026              | 0.0021               | 0.00078              | 0.39                 | 0.018                |
| 1,2,3,4,5,6,8-HpCN                       | HpCN8                   | 0.0026       | 0.0005               | 0.00006 <sup>a</sup> | 0.00006 <sup>a</sup> | 0.00005 <sup>a</sup> | 0.0010               | 0.00024              | 0.00019              | 0.00007              | 0.00031 <sup>b</sup> | 0.00013              | 0.00016 <sup>a</sup> | 0.00009 <sup>a</sup> |
| <b>Σ PCNs</b>                            |                         | <b>0.13</b>  | <b>0.12</b>          | <b>0.01</b>          | <b>0.03</b>          | <b>0.02</b>          | <b>0.46</b>          | <b>0.01</b>          | <b>0.02</b>          | <b>0.02</b>          | <b>0.03</b>          | <b>0.08</b>          | <b>0.44</b>          | <b>0.07</b>          |
| <b>Polychlorinated dibenzo-p-dioxins</b> |                         |              |                      |                      |                      |                      |                      |                      |                      |                      |                      |                      |                      |                      |
| 2,3,7,8-TCDD                             | TCDD                    | 0.00005      | 0.00002              | 0.00003              | 0.00001              | 0.00001              | 0.00003              | 0.00001              | 0.00002              | 0.00003              | 0.00002              | 0.00002              | 0.0002               | 0.00014              |
| 1,2,3,7,8-PeCDD                          | PCDD                    | 0.00018      | 0.00007              | 0.00003              | 0.00004 <sup>b</sup> | 0.00003              | 0.00014              | 0.00004              | 0.00008              | 0.00003 <sup>b</sup> | 0.00004              | 0.00003              | 0.0012               | 0.0008               |
| 1,2,3,4,7,8-HxCDD                        | HxCDD1                  | 0.00019      | 0.00006              | 0.00002              | 0.00003              | 0.00004              | 0.00016              | 0.00004              | 0.00012              | 0.00003 <sup>a</sup> | 0.00004              | 0.00002              | 0.0019               | 0.00082              |
| 1,2,3,6,7,8-HxCDD                        | HxCDD2                  | 0.00067      | 0.00012              | 0.00003              | 0.00006 <sup>b</sup> | 0.00008              | 0.00058              | 0.00005              | 0.00037              | 0.00004              | 0.00009              | 0.00011              | 0.0045               | 0.0017               |
| 1,2,3,7,8,9-HxCDD                        | HxCDD3                  | 0.00045      | 0.00015              | 0.00003              | 0.00006              | 0.00006              | 0.00033              | 0.00005              | 0.00022              | 0.00003              | 0.00011              | 0.00018              | 0.0036               | 0.0017               |
| 1,2,3,4,6,7,8-HpCDD                      | HpCDD                   | 0.0147       | 0.00076              | 0.00013              | 0.00041              | 0.0014               | 0.015                | 0.00045              | 0.0091               | 0.00025              | 0.00096              | 0.0005               | 0.12                 | 0.016                |
| OCDD                                     | OCDD                    | 0.15         | 0.004                | 0.00072              | 0.0059               | 0.012                | 0.15                 | 0.0022               | 0.076                | 0.0027               | 0.0073               | 0.0036               | 0.74                 | 0.075                |
| <b>Σ PCDD</b>                            |                         | <b>0.17</b>  | <b>0.005</b>         | <b>0.001</b>         | <b>0.007</b>         | <b>0.014</b>         | <b>0.16</b>          | <b>0.003</b>         | <b>0.085</b>         | <b>0.003</b>         | <b>0.009</b>         | <b>0.004</b>         | <b>0.864</b>         | <b>0.097</b>         |
| <b>Polychlorinated dibenzofurans</b>     |                         |              |                      |                      |                      |                      |                      |                      |                      |                      |                      |                      |                      |                      |
| 2,3,7,8-TCDF                             | TCDF                    | 0.00037      | 0.0002               | 0.00003              | 0.00004              | 0.00008              | 0.00043              | 0.00007              | 0.00027              | 0.00003              | 0.00007              | 0.00004              | 0.0015               | 0.024                |
| 1,2,3,7,8/1,2,3,4,8-PeCDF                | PCDF1                   | 0.00094      | 0.00034              | 0.00004              | 0.00007              | 0.00009              | 0.00036              | 0.00009              | 0.00018              | 0.00006              | 0.00014              | 0.00005              | 0.0022               | 0.025                |
| 2,3,4,7,8-PeCDF                          | PCDF2                   | 0.00055      | 0.00017              | 0.00002              | 0.00002              | 0.00007              | 0.00029              | 0.00006              | 0.00012              | 0.00003              | 0.00006              | 0.00002              | 0.0013               | 0.0052               |
| 1,2,3,4,7,8/1,2,3,4,7,9-HxCDFHxCF1/HxCF2 | HxCDF                   | 0.0013       | 0.00023              | 0.00002              | 0.00003 <sup>b</sup> | 0.00011              | 0.00043              | 0.00009              | 0.00019              | 0.00003              | 0.00012              | 0.00004              | 0.0036               | 0.017                |
| 1,2,3,6,7,8-HxCDF                        | HxCDF3                  | 0.00092      | 0.00019              | 0.00002              | 0.00003              | 0.00006              | 0.00029              | 0.00005              | 0.00013              | 0.00002 <sup>b</sup> | 0.00007              | 0.00004              | 0.0024               | 0.0058               |
| 1,2,3,7,8,9-HxCDF                        | HxCDF4                  | 0.00021      | 0.0001               | 0.00005              | 0.00009 <sup>b</sup> | 0.00006              | 0.00009              | 0.00003              | 0.00008              | 0.00009              | 0.00022              | 0.00001 <sup>a</sup> | 0.00039              | 0.0021               |
| 2,3,4,6,7,8-HxCDF                        | HxCDF5                  | 0.00066      | 0.00015              | 0.00002              | 0.00003              | 0.00006              | 0.00034              | 0.00004              | 0.00016              | 0.00003              | 0.00008              | 0.00002              | 0.0014               | 0.0045               |
| 1,2,3,4,6,7,8-HpCDF                      | HpCDF1                  | 0.0059       | 0.00059              | 0.00008              | 0.00016              | 0.00045              | 0.0034               | 0.00029              | 0.0014               | 0.00012              | 0.00071              | 0.00017              | 0.03                 | 0.03                 |
| 1,2,3,4,7,8,9-HpCDF                      | HpCDF2                  | 0.00066      | 0.00009 <sup>b</sup> | 0.00002              | 0.00002              | 0.00003 <sup>b</sup> | 0.00026              | 0.00003 <sup>b</sup> | 0.00008 <sup>b</sup> | 0.00005              | 0.00007              | 0.00002              | 0.0025               | 0.0061               |
| OCDF                                     | OCDF                    | 0.011        | 0.00041              | 0.00011              | 0.00037              | 0.001 <sup>d</sup>   | 0.0075               | 0.00041              | 0.0013               | 0.00024              | 0.00076              | 0.00025              | 0.12                 | 0.043                |
| <b>Σ PCDFs</b>                           |                         | <b>0.022</b> | <b>0.002</b>         | <b>0.00041</b>       | <b>0.001</b>         | <b>0.002</b>         | <b>0.013</b>         | <b>0.001</b>         | <b>0.004</b>         | <b>0.001</b>         | <b>0.002</b>         | <b>0.001</b>         | <b>0.169</b>         | <b>0.163</b>         |

<sup>a</sup> Lower than detection limit at signal-to-noise 3 to 1, <sup>b</sup> Isotope ratio deviates more than 20% from theoretical value, <sup>c</sup> Lower than 10 x method blank, <sup>d</sup> Recovery is not according to quality criteria.

\*non-ortho-PCBs
